# Supplementary material
Source: Springer Nature journal article supplement (https://www.springermedizin.de/resource/supplementary/12967_2014_1781_MOESM1_ESM.pdf/9575306)
Supplement: MOESM1 [file 9575306]

Sample digest (label-free or labeled)

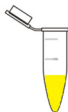

nanoLC separation

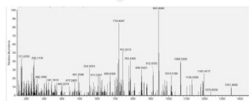

LC-MS/MS

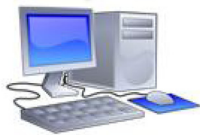

Data analysis

Diagnostic biomarker candidates

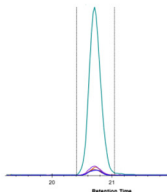

Quantification and validation  
with MRM analysis
